# Supplementary material for: Accumulation of eicosapolyenoic acids enhances sensitivity to abscisic acid and mitigates the effects of drought in transgenic Arabidopsis thaliana
Source: PubMed Central journal article supplement (PMC3967093; doi:10.1093/jxb/eru031), 2014-03-07
Supplement: supp_eru031_jexbot097782_file001.pdf [file supp_eru031_jexbot097782_file001.pdf]

**Accumulation of eicosapolyenoic acids confers enhanced sensitivity to  
abscisic acid and mitigates the effects of drought in transgenic  
*Arabidopsis thaliana***

*Xiaowei Yuan, Yaxiao Li, Shiyang Liu, Xinzheng Li, and Baoxiu Qi*

Table 1S. Sequences of primers used in this study.

| Primer    | Sequence (5'-3')        |
|-----------|-------------------------|
| ACT2-F    | TTGTGCTGGATTCTGGTGATG   |
| ACT2-R    | CGCTCTGCTGTTGTGGTG      |
| NCED3-F   | ACAAGGTCGCAAGATTCGG     |
| NCED3-R   | TTGAGTCTGGTGGAGTCATACAG |
| ABA1-F    | AATGGTCAACGCTATGAAGGT   |
| ABA1-R    | CCCGTGTAACAAGTGTAGCCT   |
| ABA2-F    | TGGAGGAGCCACAGGGATAG    |
| ABA2-R    | CTGCTTCGTGGTGAGTCCAA    |
| ABA3-F    | GGATCATGCTGGTTCTACTTTG  |
| ABA3-R    | TGTCGAGCATCCGCTATAAG    |
| AAO3-F    | AGCAGTTGTGAAGCCGTTAG    |
| AAO3-R    | ACCATACGCTTGTGAATGAG    |
| CYP707A-F | AGTCCATCAACACCCTCG      |
| CYP707A-R | TACTTTCCTTAGTTCCTCGCT   |
| RCAR1-F   | CGAGACGGTGCAATACGT      |
| RCAR1-R   | AAGACTGCCGATTTTCAGG     |
| PYR1-F    | TCCAGGAAGCTGTTTCATCACT  |
| PYR1-R    | CGACGGAGCAGGATTTGA      |
| GTG1-F    | AGGCAAGGATGATAAACTGG    |
| GTG1-R    | GCTGAAGGCATAGGGAAAT     |
| GTG2-F    | GTGCGGTCGGTTCAAGAT      |
| GTG2-R    | CCACCTCTGCCTCCATTAG     |
| ABI1-F    | TCCCGTCTCACATCTTCGTC    |
| ABI1-R    | CTTCTCTATCCGTTTATGGTCA  |
| ABI2-F    | TGTTCCATTCAGACCATTAC    |
| ABI2-R    | ATATCCACACCTGCCATAGC    |
| ABI5-F    | TATGGGAGGGCTAAGGGG      |
| ABI5-R    | CGCATTCTTCTTTCAACTG     |
| SNRK2.2-F | ATGGTCTTGCGGTGTAAC      |
| SNRK2.2-R | GGTGTAAGTCCTCTGGGAT     |
| SNRK2.3-F | GGTCACTAAGGCATCCTAATA   |
| SNRK2.3-R | GCAAATCCGCTCGTAAAG      |
| RD29B-F   | GGGAAAGGACATGGTGAGG     |

---

|          |                         |
|----------|-------------------------|
| RD29B-R  | ACGGTGGTGCCAAGTGAT      |
| RD26-F   | TCCCAAAGGCACTAAAACCAA   |
| RD26-R   | GACACAACACCCAATCATCCA   |
| ABF3-F   | TTCAATGATGGGAAACAATACC  |
| ABF3-R   | ACTAATCGTCCGAGGCAAG     |
| COR15A-F | AAGAGGCATTAGCAGATGGTGAG |
| COR15A-R | GTTTGCGGCTTCTTTTCCTTT   |
| ADH1-F   | CTTGGTGCTGTTGGTTTAGG    |
| ADH1-R   | TGTCATGGTCTTTCGGGTT     |
| ABF2-F   | TTAGGCGTTGGTGCTGTG      |
| ABF2-R   | TTGTTTGGTCTGCCGTGA      |

---

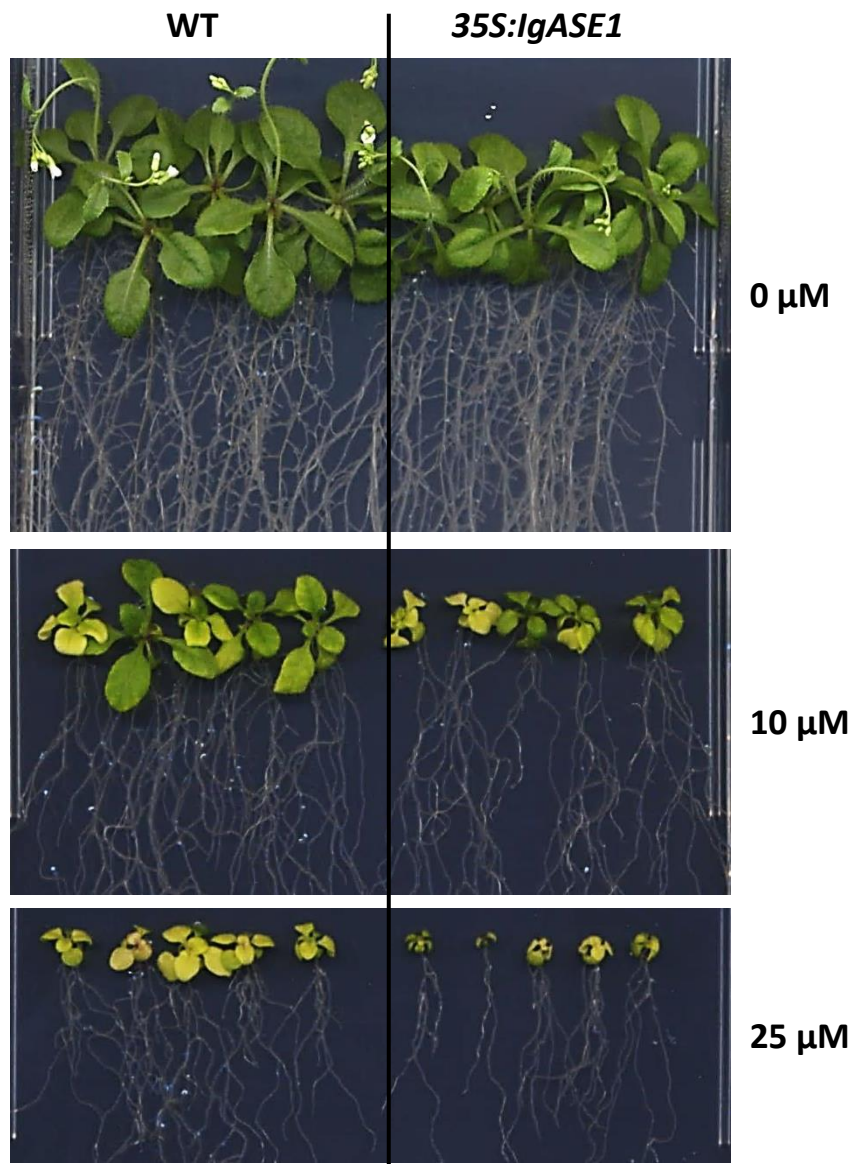

**Fig. S1.** *IgASE1* expressing seedlings (*35:IgASE1*) were more sensitive to ABA during early seedling development. WT and transgenic seeds were germinated on  $\frac{1}{2}$  MS media for 5 days. They were then transferred to  $\frac{1}{2}$  MS media supplemented without (0  $\mu\text{M}$ ), or with 10 and 25  $\mu\text{M}$  ABA. They were scanned after 18 days cultivation in an environmental controlled growth room under long days.

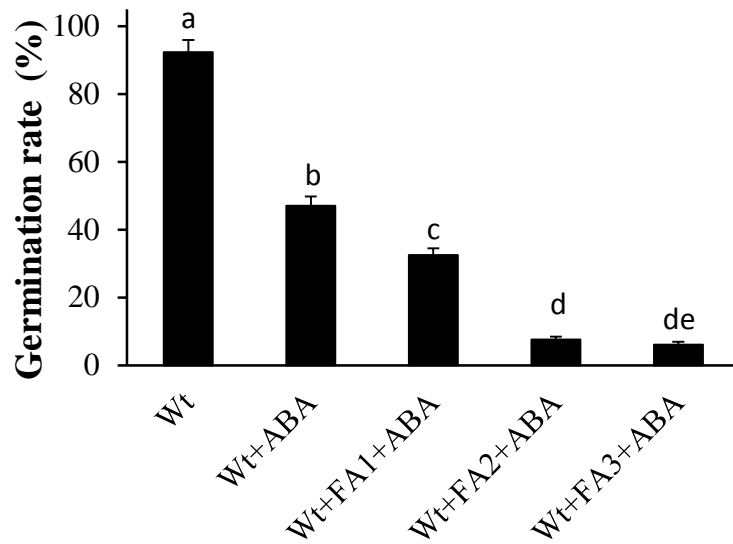

**Fig. S2.** Effect of different amounts of exogenously supplied fatty acids to percentage of germinated seeds of the wild-type *Arabidopsis* in the presence of 0.5  $\mu$ M ABA. Seeds were germinated for 48h. FA1, 2.5 $\mu$ M of each EDA and ETrA; FA2, 5 $\mu$ M of each EDA and ETrA; FA3, 10 $\mu$ M of each EDA and ETrA). Different letters indicate statistically different values after one-way ANOVA.
